# Supplementary material for: Proposal of names for 328 higher rank taxa defined in the Genome Taxonomy Database under two prokaryotic codes
Source: Research Square preprint supplement (doi:10.21203/rs.3.rs-3036737/v1), 2023-06-09
Supplement: Supplementary file 1 [file 6c3c555fdbb244a0e5c6d5bf.pdf]

**Supplementary Table 1.** Genome sequences proposed as types for *Candidatus* species that satisfy the SeqCode data quality recommendations.

| Proposed species name <sup>1</sup>        | NCBI Identifier | Genome Type                       | Completeness | Contamination | Checkm2_compl | Checkm2_cont | Contig count | MIMAG_high | MIMAG_med | N50_contig_kb | Longest_contig_kb | tRNA_count | tRNA_aa_count | ssu_count | ssu_length | lsu_23s_count | lsu_23s_length |
|-------------------------------------------|-----------------|-----------------------------------|--------------|---------------|---------------|--------------|--------------|------------|-----------|---------------|-------------------|------------|---------------|-----------|------------|---------------|----------------|
| <i>Cloacimonas acidaminivorans</i>        | GCA_000146065.1 | Isolate                           | 100          | 1.1           | 99.91         | 0.19         | 1            | TRUE       | FALSE     | 2246.82       | 2246.82           | 46         | 20            | 2         | 1598       | 2             | 3037           |
| <i>Puniceispirillum marinum</i>           | GCA_000024465.1 | Isolate                           | 99.94        | 0.15          | 100           | 0.09         | 1            | TRUE       | FALSE     | 2753.527      | 2753.527          | 36         | 20            | 1         | 1484       | 1             | 2715           |
| <i>Tenderia electrophaga</i>              | GCA_001447805.1 | derived from environmental sample | 99.63        | 2.05          | 100           | 0.53         | 2            | TRUE       | FALSE     | 3656.958      | 3656.958          | 41         | 20            | 1         | 1499       | 1             | 2890           |
| <i>Pseudothioglobus singularis</i>        | GCA_001281385.1 | Isolate                           | 98.68        | 0             | 99.99         | 0.23         | 1            | TRUE       | FALSE     | 1714.148      | 1714.148          | 38         | 20            | 1         | 1536       | 1             | 2885           |
| <i>Desulfuridis audaxviator</i>           | GCA_000018425.1 | Isolate                           | 98.09        | 0.32          | 99.98         | 0.18         | 1            | TRUE       | FALSE     | 2349.476      | 2349.476          | 45         | 20            | 2         | 1697       | 3             | 3372           |
| <i>Obscuribacter phosphatis</i>           | GCA_001899315.1 | derived from metagenome           | 97.44        | 2.28          | 95.27         | 4.37         | 55           | TRUE       | FALSE     | 246.807       | 735.22            | 42         | 20            | 1         | 1488       | 1             | 2957           |
| <i>Kapaibacterium thiocyanatum</i>        | GCA_001899175.1 | derived from metagenome           | 96.99        | 0             | 99.28         | 0.05         | 31           | TRUE       | FALSE     | 373.065       | 951.664           | 42         | 20            | 1         | 1483       | 1             | 2789           |
| <i>Muiribacterium halophilum</i>          | GCA_002869225.1 | derived from metagenome           | 96.56        | 3.5           | 90.31         | 4.31         | 154          | TRUE       | FALSE     | 32.07         | 182.03            | 39         | 20            | 1         | 1556       | 1             | 3009           |
| <i>Methylomirabilis oxygentifera</i>      | GCA_000091165.1 | derived from environmental sample | 96.26        | 2.59          | 100           | 0.45         | 1            | TRUE       | FALSE     | 2752.854      | 2752.854          | 47         | 20            | 1         | 1558       | 1             | 3023           |
| <i>Promineifilum breve</i>                | GCA_900066015.1 | Isolate                           | 93.64        | 3.64          | 99.93         | 1.58         | 3            | TRUE       | FALSE     | 3989.163      | 3989.163          | 48         | 20            | 1         | 1504       | 1             | 2927           |
| <i>Magnetobacterium casense</i>           | GCA_000714715.1 | Isolate                           | 92.42        | 0.91          | 92.54         | 0.23         | 70           | TRUE       | FALSE     | 90.253        | 252.526           | 41         | 20            | 1         | 1525       | 1             | 2981           |
| <i>Hepatobacter penaei</i>                | GCA_000742475.1 | Isolate                           | 91.94        | 0             | 97.11         | 0            | 15           | TRUE       | FALSE     | 133.248       | 241.151           | 44         | 20            | 1         | 1612       | 1             | 2746           |
| <i>Hydrothermus pacificus</i>             | GCA_002011615.1 | derived from metagenome           | 91.53        | 0             | 95.11         | 0.02         | 19           | TRUE       | FALSE     | 176.033       | 342.452           | 45         | 20            | 1         | 1563       | 1             | 3900           |
| <i>Bipolaricaulis anaerobius</i>          | GCA_900465355.1 | Isolate                           | 91.53        | 0             | 98.02         | 0.04         | 1            | TRUE       | FALSE     | 1324.338      | 1324.338          | 46         | 20            | 1         | 1562       | 1             | 3023           |
| <i>Binatus soli</i>                       | GCA_002479255.1 | derived from metagenome           | 97.48        | 0.84          | 98.02         | 0.01         | 65           | FALSE      | TRUE      | 138.054       | 233.241           | 48         | 20            | 1         | 1563       | 2             | 1888           |
| <i>Hepatoplasma crinochetorum</i>         | GCA_000582535.1 | Isolate                           | 92.17        | 0             | 97.05         | 0.05         | 1            | FALSE      | TRUE      | 657.101       | 657.101           | 27         | 20            | 1         | 1533       | 1             | 2933           |
| <i>Azobacteroides pseudotrichonymphae</i> | GCA_000010645.1 | derived from single cell          | 89.51        | 1.09          | 99.95         | 0            | 5            | FALSE      | TRUE      | 1114.206      | 1114.206          | 38         | 20            | 2         | 1516       | 1             | 2887           |
| <i>Nucleicultrix amoebiphila</i>          | GCA_002117145.1 | Isolate                           | 78.38        | 0             | 96.55         | 0.2          | 1            | FALSE      | TRUE      | 1838.212      | 1838.212          | 44         | 20            | 2         | 1483       | 2             | 2748           |
| <i>Saccharimonas aalborgensis</i>         | GCA_000392435.1 | Isolate                           | 67.13        | 0.93          | 99.75         | 0.33         | 1            | FALSE      | TRUE      | 1013.781      | 1013.781          | 46         | 20            | 1         | 1500       | 1             | 3190           |
| <i>Johnnevsia muelleri</i>                | GCA_000953435.1 | Isolate                           | 27.08        | 0             | 96.63         | 0.13         | 1            | FALSE      | FALSE     | 357.498       | 357.498           | 32         | 20            | 1         | 1547       | 1             | 2960           |
| <i>Thermobaculum terrenum</i>             | GCA_000025005.1 | Isolate                           | 98.58        | 0             | 99.97         | 0.8          | 2            | FALSE      | TRUE      | 2026947       | 2026947           | 51         | 20            | 2         | 1502       | 2             | 2927           |

<sup>1</sup> Name corrected as suggested by Oren *et al.* (2020)

**Supplementary Table 2.** Corrections implemented in GTDB for effectively published names of phyla defined elsewhere.

| <b>Taxon name</b>                                                                                                                                            | <b>Type<sup>1</sup></b>                                                                                      | <b>Etymology</b>                                                                                                                                                                                                              | <b>Properties and Membership<sup>2</sup></b>                                                                                                              |
|--------------------------------------------------------------------------------------------------------------------------------------------------------------|--------------------------------------------------------------------------------------------------------------|-------------------------------------------------------------------------------------------------------------------------------------------------------------------------------------------------------------------------------|-----------------------------------------------------------------------------------------------------------------------------------------------------------|
| <i>Candidatus</i><br>Aenigmatarcaeota<br>corrig.<br>(effectively published<br>synonym: <i>Candidatus</i><br>Aenigmarchaeota Rinke<br><i>et al.</i> , 2013)   | Genus <i>Candidatus</i><br><i>Aenigmatarcaeum</i><br><sup>4</sup> corrig. Rinke <i>et</i><br><i>al.</i> 2013 | Ae.nig.mat.ar.chaeo'ta. N.L. neut. n.<br><i>Aenigmatarcaeum</i> a <i>Candidatus</i> genus name; <i>-ota</i><br>ending to denote a phylum; N.L. neut. pl. n.<br><i>Aenigmatarcaeota</i> the <i>Aenigmatarcaeum</i> phylum      | The properties of the phylum are as given by Rinke <i>et al.</i> ,<br>2013. Membership: <i>Candidatus</i> Aenigmarchaeia (Rinke <i>et al.</i> ,<br>2021). |
| <i>Candidatus</i> Aerophobota<br>corrig.<br>(effectively published<br>synonym: <i>Candidatus</i><br>Aerophobetes Rinke <i>et</i><br><i>al.</i> 2013)         | Genus <i>Candidatus</i><br>Aerophobus Rinke<br><i>et al.</i> 2013                                            | A.e.ro.pho.bo'ta. N.L. masc. n. <i>Aerophobus</i> a<br><i>Candidatus</i> genus name; <i>-ota</i> ending to denote a<br>phylum; N.L. pl. neut. n. <i>Aerophobota</i> the <i>Aerophobus</i><br>phylum                           | The properties of the phylum are as given by Rinke <i>et al.</i> ,<br>2013. Membership: <i>Candidatus</i> Aerophobia <sup>3</sup>                         |
| <i>Candidatus</i><br>Calescibacteriota corrig.<br>(effectively published<br>synonym: <i>Candidatus</i><br>Calesciantes Rinke <i>et</i><br><i>al.</i> , 2013) | Genus <i>Candidatus</i><br><i>Calescibacterium</i><br>Rinke <i>et al.</i> , 2013                             | Ca.les.ci.bac.te.ri.o'ta. N.L. neut. n. <i>Calescibacterium</i><br>a <i>Candidatus</i> genus name; <i>-ota</i> ending to denote a<br>phylum; N.L. pl. neut. n. <i>Calescibacteriota</i> the<br><i>Calescibacterium</i> phylum | The properties of the phylum are as given by Rinke <i>et al.</i> ,<br>2013. Membership: <i>Candidatus</i> Calescibacteriia <sup>3</sup> .                 |

| <b>Taxon name</b>                                                                                                                                            | <b>Type<sup>1</sup></b>                                                    | <b>Etymology</b>                                                                                                                                                                                                  | <b>Properties and Membership<sup>2</sup></b>                                                                                                                                                            |
|--------------------------------------------------------------------------------------------------------------------------------------------------------------|----------------------------------------------------------------------------|-------------------------------------------------------------------------------------------------------------------------------------------------------------------------------------------------------------------|---------------------------------------------------------------------------------------------------------------------------------------------------------------------------------------------------------|
| <i>Candidatus</i><br>Cloacimonadota corrig.<br>(effectively published<br>synonym: <i>Candidatus</i><br>Cloacimonetes Rinke <i>et al.</i> , 2013)             | Genus <i>Candidatus</i><br>Cloacimonas<br>Pelletier <i>et al.</i> 2008     | Clo.a.ci.mo.na.do'ta. N.L. fem. n. <i>Cloacimonas</i> a<br>Candidatus genus name; <i>-ota</i> ending to denote a<br>phylum; N.L. pl. neut. n. <i>Cloacimonadota</i> the<br><i>Cloacimonas</i> phylum              | The properties of the phylum are as given by Rinke <i>et al.</i> ,<br>2013. Membership: <i>Candidatus</i> Cloacimonadia <sup>3</sup>                                                                    |
| <i>Candidatus</i><br>Dormibacterota corrig.<br>(effectively published<br>synonym: <i>Candidatus</i><br>Dormibacteraeota Ji <i>et al.</i> 2017)               | Genus <i>Candidatus</i><br>Dormibacter Ji <i>et al.</i> 2017               | Dor.mi.bac.te.ro'ta. N.L. masc. n. <i>Dormibacter</i> a<br>Candidatus genus name; <i>-ota</i> ending to denote a<br>phylum; N.L. pl. neut. n. <i>Dormibacterota</i> the<br><i>Dormibacter</i> phylum              | The properties of the phylum are as given by Ji <i>et al.</i> , 2017.<br>Membership: <i>Candidatus</i> Dormibacteria (Montgomery <i>et al.</i> ,<br>2021)                                               |
| <i>Candidatus</i><br>Eremiobacterota<br>corrig.<br>(effectively published<br>synonym: <i>Candidatus</i><br>Eremiobacteraeota Ji <i>et al.</i> 2017)          | Genus <i>Candidatus</i><br>Eremiobacter Ji <i>et al.</i> 2017              | E.re.mi.o.bac.te.ro'ta. N.L. masc. n. <i>Eremiobacter</i> a<br>Candidatus genus name; <i>-ota</i> ending to denote a<br>phylum; N.L. pl. neut. n. <i>Eremiobacterota</i> the<br><i>Eremiobacter</i> phylum        | The properties of the phylum are as given by Ji <i>et al.</i> , 2017.<br>Membership: <i>Candidatus</i> Eremiobacteria (Ward <i>et al.</i> 2019),<br><i>Candidatus</i> Xenobia (Ji <i>et al.</i> , 2021) |
| <i>Candidatus</i><br>Fermentibacterota corrig.<br>(effectively published<br>synonym: <i>Candidatus</i><br>Fermentibacteria<br>Kirkegaard <i>et al.</i> 2016) | Genus <i>Candidatus</i><br>Fermentibacter<br>Kirkegaard <i>et al.</i> 2016 | Fer.men.ti.bac.te.ro'ta. N.L. masc. n. <i>Fermentibacter</i> a<br>Candidatus genus name; <i>-ota</i> ending to denote a<br>phylum; N.L. pl. neut. n. <i>Fermentibacterota</i> the<br><i>Fermentibacter</i> phylum | The properties of the phylum are as given by Kirkegaard <i>et al.</i> , 2016. Membership: <i>Candidatus</i> Fermentibacteria<br>(Kirkegaard <i>et al.</i> , 2016)                                       |

| <b>Taxon name</b>                                                                                                                                              | <b>Type<sup>1</sup></b>                                                      | <b>Etymology</b>                                                                                                                                                                                                     | <b>Properties and Membership<sup>2</sup></b>                                                                                                                          |
|----------------------------------------------------------------------------------------------------------------------------------------------------------------|------------------------------------------------------------------------------|----------------------------------------------------------------------------------------------------------------------------------------------------------------------------------------------------------------------|-----------------------------------------------------------------------------------------------------------------------------------------------------------------------|
| <i>Candidatus</i><br>Hydrogenedentota corrig.<br>(effectively published<br>synonym: <i>Candidatus</i><br>Hydrogenedentes Rinke<br>et al., 2013)                | Genus <i>Candidatus</i><br>Hydrogenedens<br>Rinke et al., 2013               | Hyd.ro.ge.ne.den.to'ta. N.L. masc. n. <i>Hydrogenedens</i><br>a <i>Candidatus</i> genus name; <i>-ota</i> ending to denote a<br>phylum; N.L. pl. neut. n. <i>Hydrogenedentota</i> the<br><i>Hydrogenedens</i> phylum | The properties of the phylum are as given by Rinke <i>et al.</i> ,<br>2013. Membership: <i>Candidatus</i> Hydrogenedentia <sup>3</sup>                                |
| <i>Candidatus</i><br>Latescibacterota corrig.<br>(effectively published<br>synonym: <i>Candidatus</i><br>Latescibacteria Rinke <i>et</i><br><i>al.</i> , 2013) | Genus <i>Candidatus</i><br>Latescibacter Rinke<br><i>et al.</i> , 2013       | La.te.sci.bac.te.ro'ta. N.L. masc. n. <i>Latescibacter</i> a<br><i>Candidatus</i> genus name; <i>-ota</i> ending to denote a<br>phylum; N.L. pl. neut. n. <i>Latescibacterota</i> the<br><i>Latescibacter</i> phylum | The properties of the phylum are as given by Rinke <i>et al.</i> ,<br>2013. Membership: <i>Candidatus</i> Latescibacteria <sup>3</sup>                                |
| <i>Candidatus</i><br>Moduliflexota corrig.<br>(effectively published<br>synonym: <i>Candidatus</i><br>Modulibacteria<br>Sekiguchi <i>et al.</i> , 2015)        | Genus <i>Candidatus</i><br>Moduliflexus<br>Sekiguchi <i>et al.</i> ,<br>2015 | Mo.du.li.fle.xo'ta. N.L. masc. n. <i>Moduliflexus</i> a<br><i>Candidatus</i> genus name; <i>-ota</i> ending to denote a<br>phylum; N.L. pl. neut. n. <i>Moduliflexota</i> the<br><i>Moduliflexus</i> phylum          | The properties of the phylum are as given by Sekiguchi <i>et al.</i> ,<br>2015. Membership: <i>Candidatus</i> Moduliflexia (Sekiguchi <i>et</i><br><i>al.</i> , 2015) |

<sup>1</sup> Type denotes nomenclature type as defined under ICNP

<sup>2</sup> Membership is based on release R06-RS207 of GTDB

<sup>3</sup> Taxon proposed as part of this ms

<sup>4</sup> GTDB Latin placeholder name

<sup>5</sup> Name correction as suggested by Oren *et al.* (2020)

**Supplementary Table 3.** GTDB-defined higher taxa that retain their provisional names and reasons for their exclusion from the descriptions.

| <b>Taxon name</b>           | <b>Rank</b>    | <b>Original name and rank</b>                   | <b>Reference</b>                   | <b>Reason</b>                                                        |
|-----------------------------|----------------|-------------------------------------------------|------------------------------------|----------------------------------------------------------------------|
| <i>Cyanobacteriia</i>       | class.<br>nov. | N/A                                             | This paper.                        | Proposed type is the effectively published order ‘Cyanobacteriales’. |
| <i>Thorarchaeia</i>         | class.<br>nov. | N/A                                             | This paper.                        | No type material and no designated nomenclature type.                |
| <i>Dehalobacteriia</i>      | class.<br>nov. | N/A                                             | This paper.                        | Proposed type is the order ‘Dehalobacteriales’.                      |
| <i>Nezhaarchaeales</i>      | ord.<br>nov.   | <i>Candidatus</i> Nezhaarchaeota<br>(phylum)    | Wang <i>et al.</i> ,<br>2019       | No type material and no designated nomenclature type.                |
| <i>Geothermarchaeales</i>   | ord.<br>nov.   | <i>Candidatus</i> Geothermarchaeota<br>(phylum) | Jungbluth <i>et al.</i> , 2017     | No type material and no designated nomenclature type.                |
| <i>Buchananbacterales</i>   | ord.<br>nov.   | <i>Candidatus</i> Buchananbacteria<br>(phylum)  | Anantharaman<br><i>et al.</i> 2016 | No type material and no designated nomenclature type.                |
| <i>Magasanikbacterales</i>  | ord.<br>nov.   | <i>Candidatus</i> Magasanikbacteria<br>(phylum) | Brown <i>et al.</i><br>2015        | No type material and no designated nomenclature type.                |
| <i>Veblenbacterales</i>     | ord.<br>nov.   | <i>Candidatus</i> Veblenbacteria<br>(phylum)    | Anantharaman<br><i>et al.</i> 2016 | No type material and no designated nomenclature type.                |
| <i>Absconditabacterales</i> | ord.<br>nov.   | <i>Candidatus</i> Veblenbacteria<br>(phylum)    | Hug <i>et al.</i><br>2016          | No type material and no designated nomenclature type.                |

| <b>Taxon name</b>        | <b>Rank</b>  | <b>Original name and rank</b>                 | <b>Reference</b>                   | <b>Reason</b>                                         |
|--------------------------|--------------|-----------------------------------------------|------------------------------------|-------------------------------------------------------|
| <i>Curtissbacterales</i> | ord.<br>nov. | <i>Candidatus</i> Curtissbacteria<br>(phylum) | Brown <i>et al.</i><br>2015        | No type material and no designated nomenclature type. |
| <i>Daviesbacterales</i>  | ord.<br>nov. | <i>Candidatus</i> Daviesbacteria<br>(phylum)  | Brown <i>et al.</i><br>2015        | No type material and no designated nomenclature type. |
| <i>Levybacterales</i>    | ord.<br>nov. | <i>Candidatus</i> Levybacteria<br>(phylum)    | Brown <i>et al.</i><br>2015        | No type material and no designated nomenclature type. |
| <i>Woykebacterales</i>   | ord.<br>nov. | <i>Candidatus</i> Woykebacteria<br>(phylum)   | Anantharaman<br><i>et al.</i> 2016 | No type material and no designated nomenclature type. |
| <i>Portnoybacterales</i> | ord.<br>nov. | <i>Candidatus</i> Portnoybacteria<br>(phylum) | Anantharaman<br><i>et al.</i> 2016 | No type material and no designated nomenclature type. |
| <i>Ryanbacterales</i>    | ord.<br>nov. | <i>Candidatus</i> Ryanbacteria<br>(phylum)    | Anantharaman<br><i>et al.</i> 2016 | No type material and no designated nomenclature type. |
| <i>Spechtbacterales</i>  | ord.<br>nov. | <i>Candidatus</i> Spechtbacteria<br>(phylum)  | Anantharaman<br><i>et al.</i> 2016 | No type material and no designated nomenclature type. |
| <i>Sungbacterales</i>    | ord.<br>nov. | <i>Candidatus</i> Sungbacteria<br>(phylum)    | Anantharaman<br><i>et al.</i> 2016 | No type material and no designated nomenclature type. |
| <i>Terrybacterales</i>   | ord.<br>nov. | <i>Candidatus</i> Terrybacteria<br>(phylum)   | Anantharaman<br><i>et al.</i> 2016 | No type material and no designated nomenclature type. |
| <i>Moranbacterales</i>   | ord.<br>nov. | <i>Candidatus</i> Moranbacteria<br>(phylum)   | Brown <i>et al.</i><br>2015        | No type material and no designated nomenclature type. |

| <b>Taxon name</b>            | <b>Rank</b>  | <b>Original name and rank</b>              | <b>Reference</b>          | <b>Reason</b>                                                                                             |
|------------------------------|--------------|--------------------------------------------|---------------------------|-----------------------------------------------------------------------------------------------------------|
| <i>Rokubacteriales</i>       | ord.<br>nov. | <i>Candidatus</i> Rokubacteria<br>(phylum) | Hug <i>et al.</i><br>2016 | No type material and no designated nomenclature type.                                                     |
| <i>Dehalobacteriales</i>     | ord.<br>nov. | N/A                                        | This paper.               | Proposed type is the effectively published genus ‘Dehalobacterium’.                                       |
| <i>Thermosynechococcales</i> | ord.<br>nov. | N/A                                        | This paper.               | Proposed type is the effectively published genus ‘Thermosynechococcus’; unresolved nomenclature type      |
| <i>Rubeoparvulales</i>       | ord.<br>nov. | N/A                                        | This paper.               | Proposed type is the effectively published genus ‘Rubeoparvulum’; Untrusted source                        |
| <i>Odinarchaeales</i>        | ord.<br>nov. | N/A                                        | This paper.               | No type material and no designated nomenclature type.                                                     |
| <i>Helarchaeales</i>         | ord.<br>nov. | N/A                                        | This paper.               | No type material and no designated nomenclature type.                                                     |
| <i>Pedosphaerales</i>        | ord.<br>nov. | N/A                                        | This paper.               | Proposed type is the effectively published genus ‘Pedosphaera’; does not satisfy SeqCode quality criteria |
| <i>Pedosphaeraceae</i>       | fam.<br>nov. | N/A                                        | This paper.               | Proposed type is the effectively published genus ‘Pedosphaera’; does not satisfy SeqCode quality criteria |

| <b>Taxon name</b>            | <b>Rank</b>  | <b>Original name and rank</b>                    | <b>Reference</b>                   | <b>Reason</b>                                                                                              |
|------------------------------|--------------|--------------------------------------------------|------------------------------------|------------------------------------------------------------------------------------------------------------|
| <i>Rubeoparvulaceae</i>      | fam.<br>nov. | N/A                                              | This paper.                        | Proposed type is the effectively published genus ‘Rubeoparvulum’; Untrusted source                         |
| <i>Amesbacteraceae</i>       | fam.<br>nov. | <i>Candidatus</i> Amesbacteria<br>(phylum)       | Brown <i>et al.</i><br>2015        | No type material and no designated nomenclature type.                                                      |
| <i>Chisholmbacteraceae</i>   | fam.<br>nov. | <i>Candidatus</i> Chisholmbacteria<br>(phylum)   | Anantharaman<br><i>et al.</i> 2016 | No type material and no designated nomenclature type.                                                      |
| <i>Staskawiczbacteraceae</i> | fam.<br>nov. | <i>Candidatus</i> Staskawiczbacteria<br>(phylum) | Anantharaman<br><i>et al.</i> 2016 | No type material and no designated nomenclature type.                                                      |
| <i>Brennerbacteraceae</i>    | fam.<br>nov. | <i>Candidatus</i> Brennerbacteria<br>(phylum)    | Anantharaman<br><i>et al.</i> 2016 | No type material and no designated nomenclature type.                                                      |
| <i>Colwellbacteraceae</i>    | fam.<br>nov. | <i>Candidatus</i> Colwellbacteria<br>(phylum)    | Anantharaman<br><i>et al.</i> 2016 | No type material and no designated nomenclature type.                                                      |
| <i>Tagabacteraceae</i>       | fam.<br>nov. | <i>Candidatus</i> Tagabacteraceae<br>(phylum)    | Anantharaman<br><i>et al.</i> 2016 | No type material and no designated nomenclature type.                                                      |
| <i>Zambryskibacteraceae</i>  | fam.<br>nov. | <i>Candidatus</i> Zambryskibacteria<br>(phylum)  | Anantharaman<br><i>et al.</i> 2016 | No type material and no designated nomenclature type.                                                      |
| <i>Dehalobacteriaceae</i>    | fam.<br>nov. | N/A                                              | This paper.                        | Proposed type is the effectively published genus ‘Dehalobacterium’; can be potentially proposed under ICNP |

| <b>Taxon name</b>             | <b>Rank</b>  | <b>Original name and rank</b> | <b>Reference</b> | <b>Reason</b>                                                                                                                                                  |
|-------------------------------|--------------|-------------------------------|------------------|----------------------------------------------------------------------------------------------------------------------------------------------------------------|
| <i>Acidibacillaceae</i>       |              | N/A                           | This paper.      | Proposed type is the effectively published genus ‘Acidibacillus’; does not satisfy SeqCode quality criteria                                                    |
|                               | fam.<br>nov. |                               |                  |                                                                                                                                                                |
| <i>Vermiphilaceae</i>         |              | N/A                           | This paper.      | Proposed type is the effectively published genus ‘Vermiphilus’; the original authors of the type species will independently propose the high rank name         |
|                               | fam.<br>nov. |                               |                  |                                                                                                                                                                |
| <i>Massilibacteriaceae</i>    |              | N/A                           | This paper.      | Proposed type is the effectively published genus ‘Massilibacterium’; Untrusted source                                                                          |
|                               | fam.<br>nov. |                               |                  |                                                                                                                                                                |
| <i>Massilibacillaceae</i>     |              | N/A                           | This paper.      | Proposed type is the effectively published genus ‘Massilibacillus’; Untrusted source                                                                           |
|                               | fam.<br>nov. |                               |                  |                                                                                                                                                                |
| <i>Chloracidobacteriaceae</i> |              | N/A                           | This paper.      | Proposed type is the effectively published genus ‘Chloracidobacterium’; the original authors of the type species will independently propose the high rank name |
|                               | fam.<br>nov. |                               |                  |                                                                                                                                                                |
| <i>Chloracidobacteriales</i>  |              | N/A                           | This paper.      | Proposed type is the effectively published genus ‘Chloracidobacterium’; the original authors of the type species will independently propose the high rank name |
|                               | ord.<br>nov. |                               |                  |                                                                                                                                                                |
