# Supplementary material for: Proposal of names for 328 higher rank taxa defined in the Genome Taxonomy Database under two prokaryotic codes
Source: Research Square preprint supplement (doi:10.21203/rs.3.rs-3036737/v1), 2023-06-09
Supplement: Supplementary file 2 [file 943a89ae5a5d256b7cb398e1.pdf]

## Supplementary figures

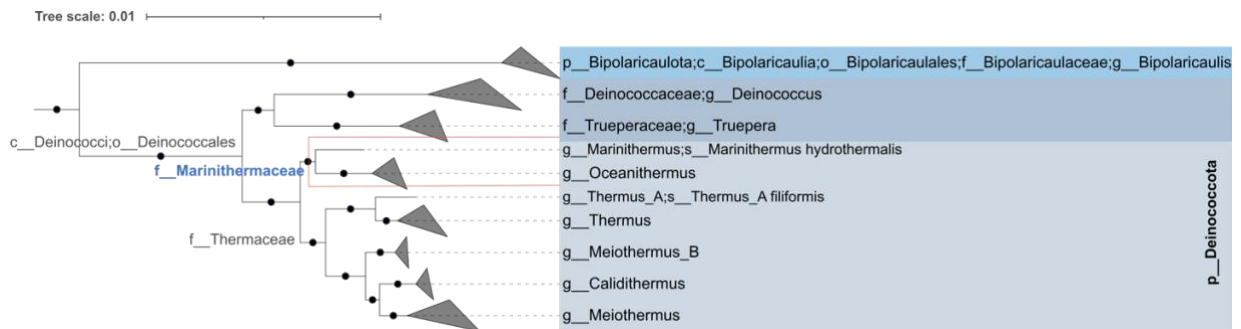

**Supplemental Figure 1.** Maximum likelihood phylogenetic inference of 120 concatenated protein markers using IQ-TREE under the LG matrix. Shading reflects rank-level grouping, with black circles indicating >90% support. Names of taxa defined in GTDB are coloured in blue.

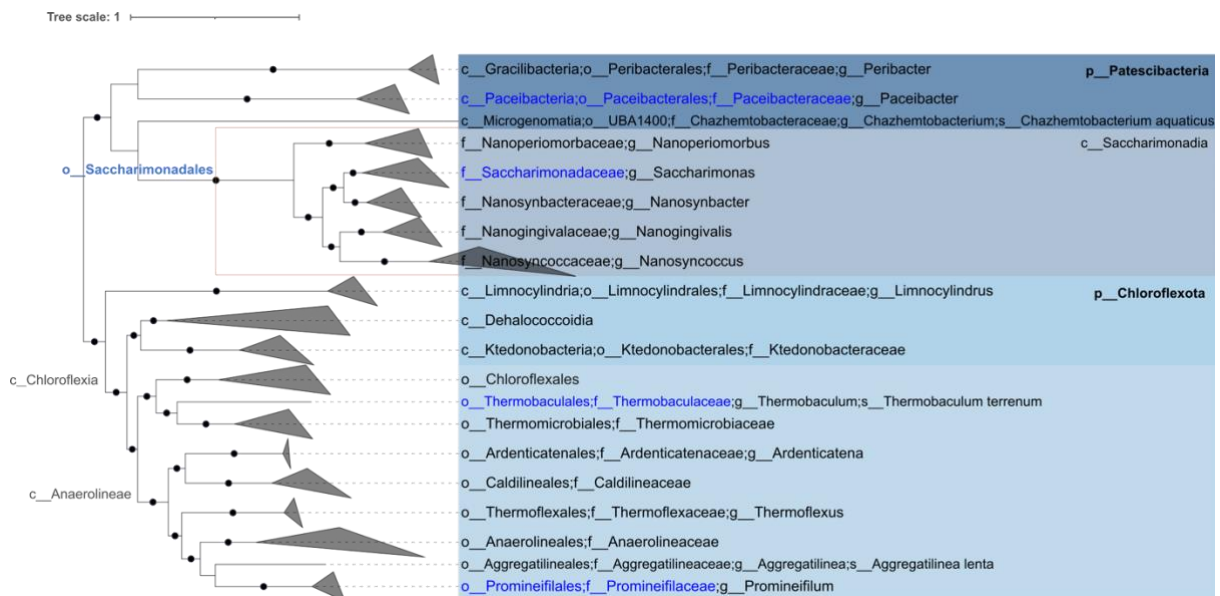

**Supplemental Figure 2** Maximum likelihood phylogenetic inference of 120 concatenated protein markers using IQ-TREE under the LG matrix. Shading reflects rank-level grouping, with black circles indicating >90% support. Names of taxa defined in GTDB are coloured in blue.

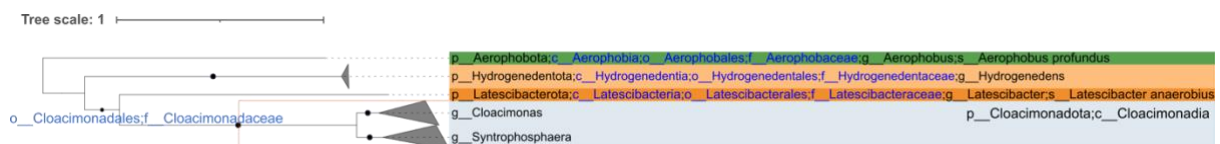

**Supplemental Figure 3.** Maximum likelihood phylogenetic inference of 120 concatenated protein markers using IQ-TREE under the LG matrix. Shading reflects rank-level grouping, with black circles indicating >90% support. Names of taxa defined in GTDB are coloured in blue.

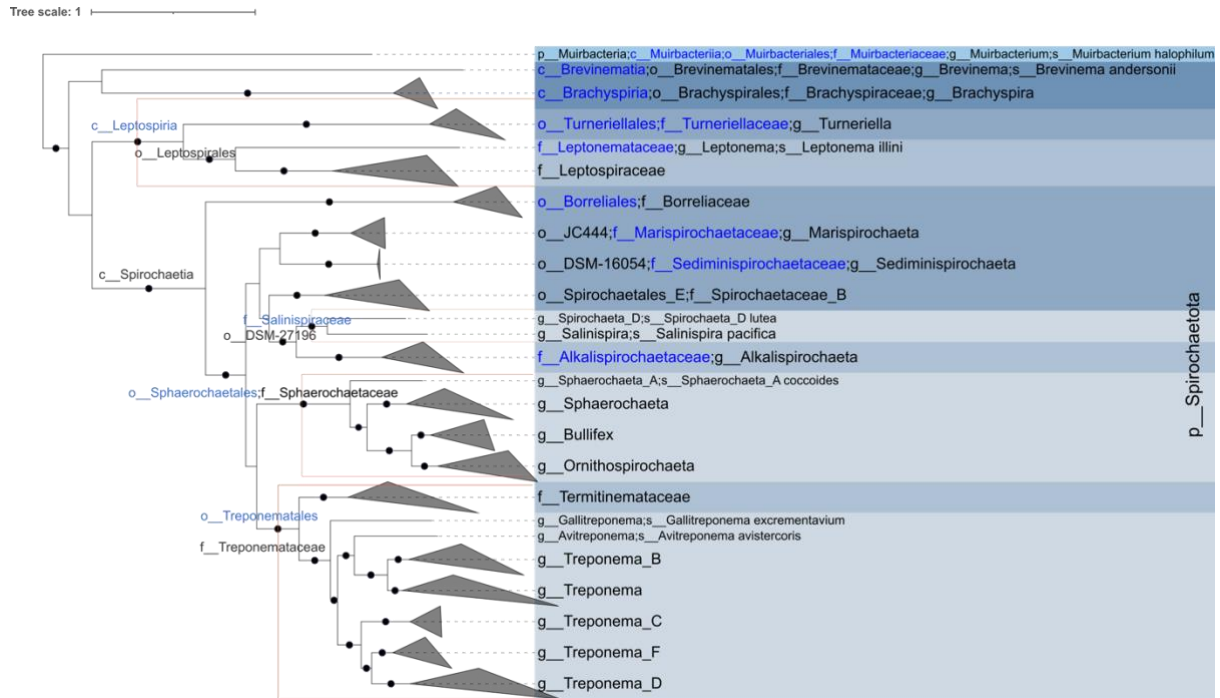

**Supplemental Figure 4.** Maximum likelihood phylogenetic inference of 120 concatenated protein markers using IQ-TREE under the LG matrix. Shading reflects rank-level grouping, with black circles indicating >90% support. Names of taxa defined in GTDB are coloured in blue.

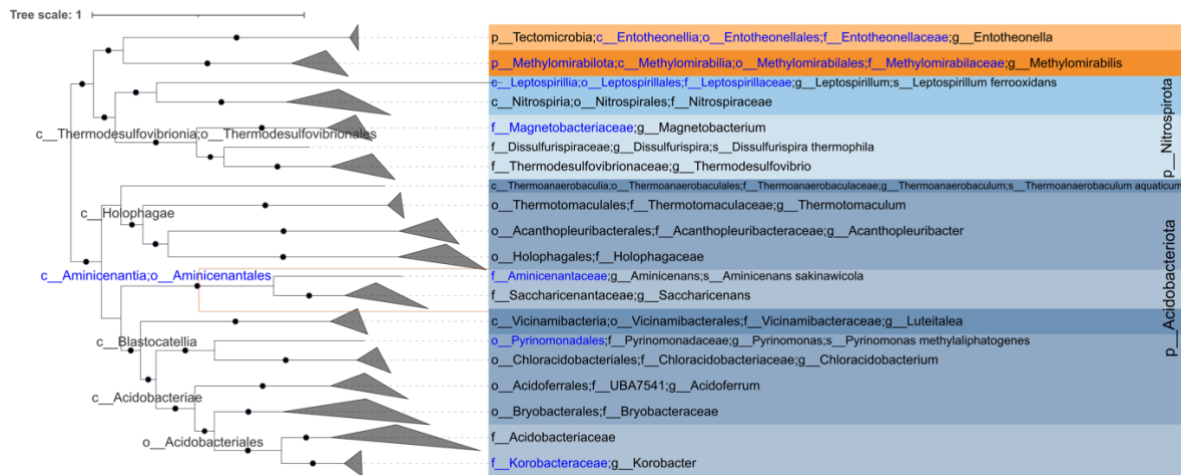

**Supplemental Figure 5.** Maximum likelihood phylogenetic inference of 120 concatenated protein markers using IQ-TREE under the LG matrix. Shading reflects rank-level grouping, with black circles indicating >90% support. Names of taxa defined in GTDB are coloured in blue.

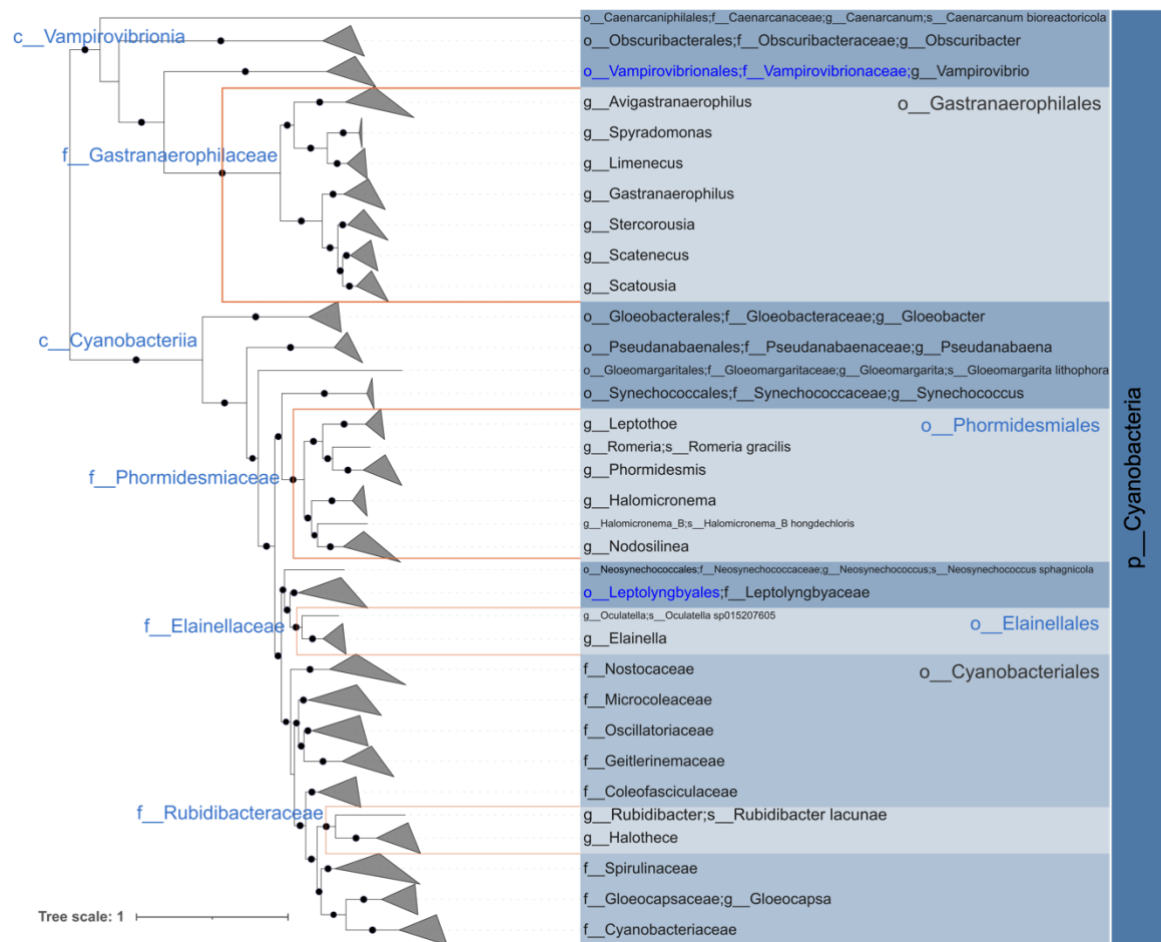

**Supplemental Figure 6.** Maximum likelihood phylogenetic inference of 120 concatenated protein markers using IQ-TREE under the LG matrix. Shading reflects rank-level grouping, with black circles indicating >90% support. Names of taxa defined in GTDB are coloured in blue.

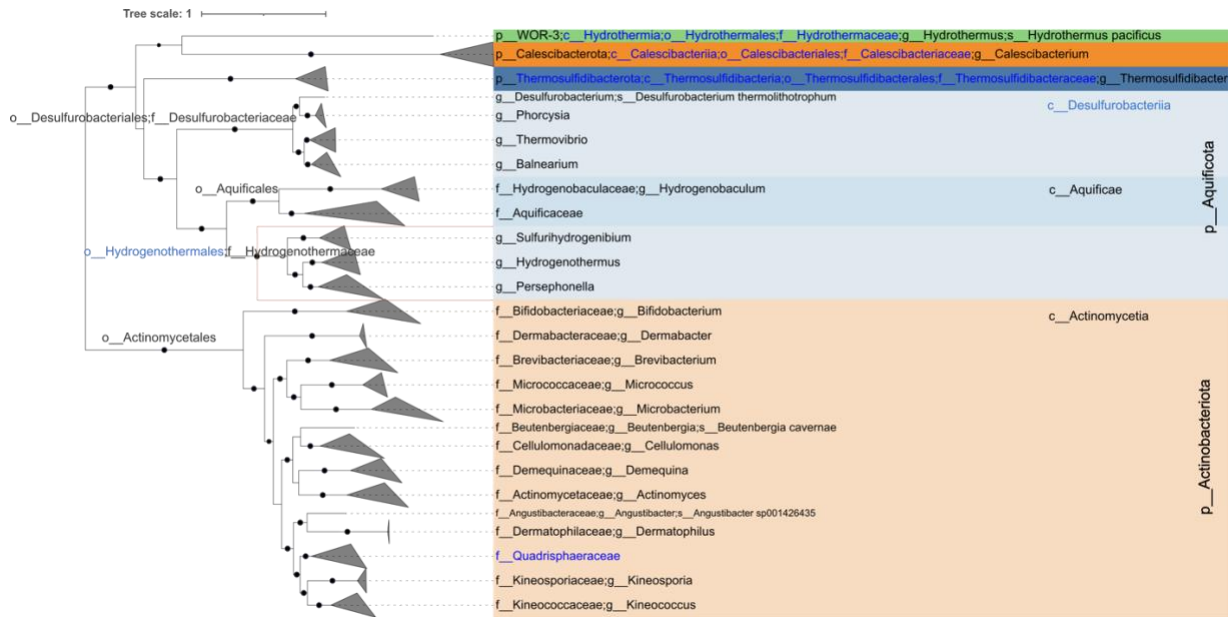

**Supplemental Figure 7.** Maximum likelihood phylogenetic inference of 120 concatenated protein markers using IQ-TREE under the LG matrix. Shading reflects rank-level grouping, with black circles indicating >90% support. Names of taxa defined in GTDB are coloured in blue.

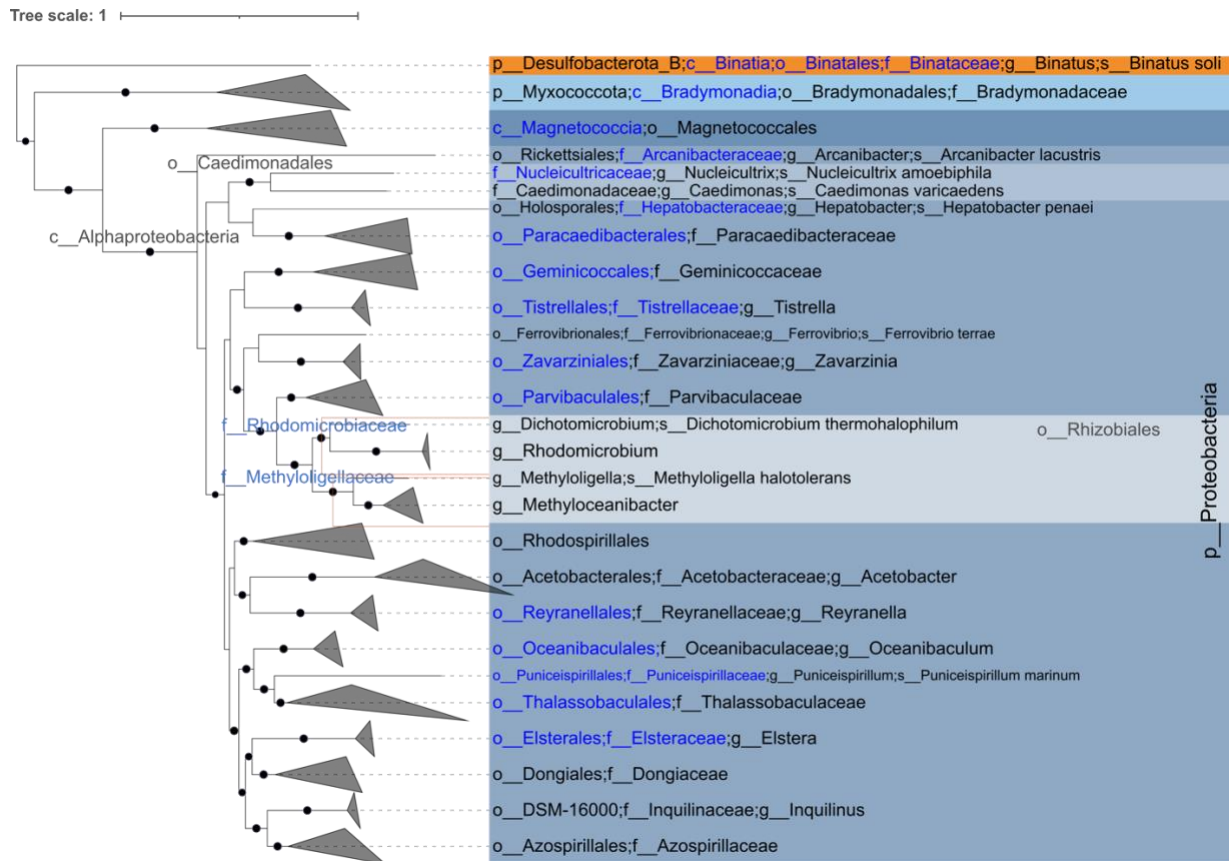

**Supplemental Figure 8.** Maximum likelihood phylogenetic inference of 120 concatenated protein markers using IQ-TREE under the LG matrix. Shading reflects rank-level grouping, with black circles indicating >90% support. Names of taxa defined in GTDB are coloured in blue.

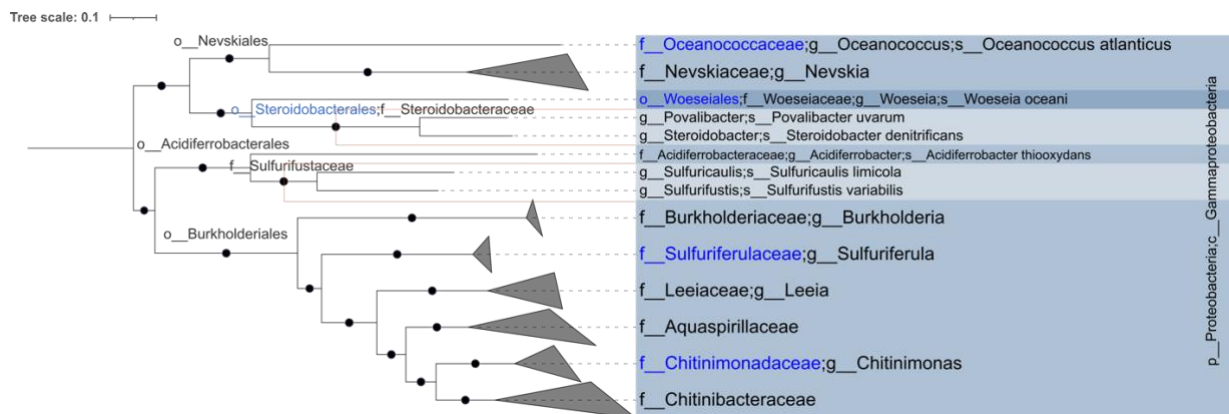

**Supplemental Figure 9.** Maximum likelihood phylogenetic inference of 120 concatenated protein markers using IQ-TREE under the LG matrix. Shading reflects rank-level grouping, with black circles indicating >90% support. Names of taxa defined in GTDB are coloured in blue.

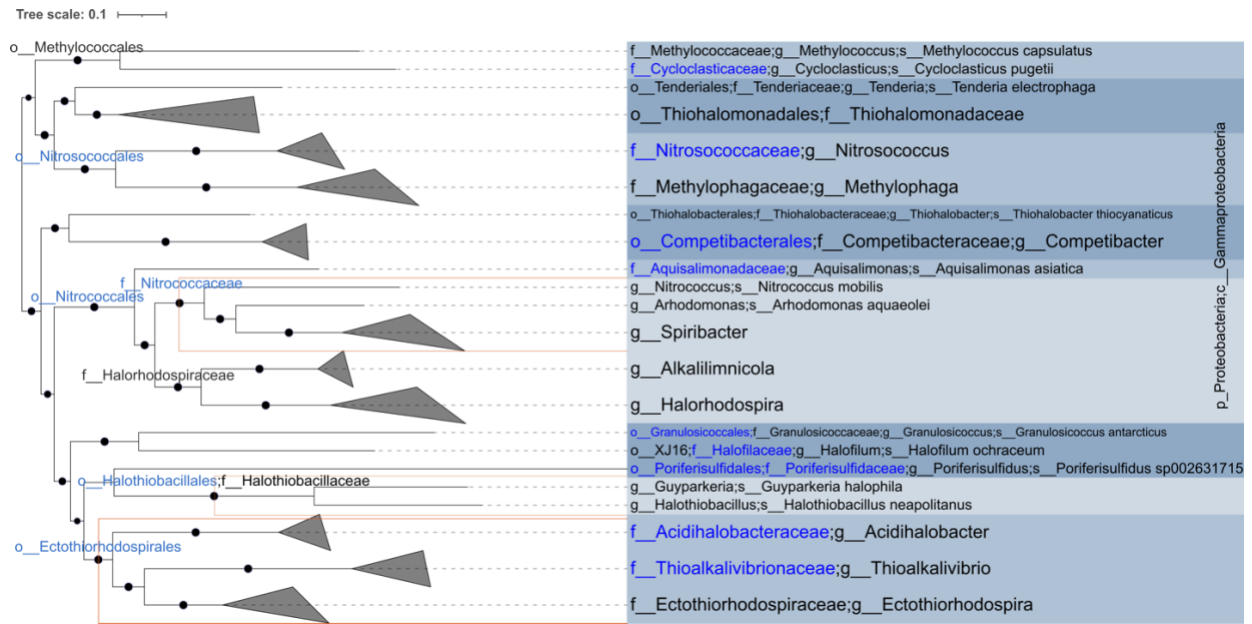

**Supplemental Figure 10.** Maximum likelihood phylogenetic inference of 120 concatenated protein markers using IQ-TREE under the LG matrix. Shading reflects rank-level grouping, with black circles indicating >90% support. Names of taxa defined in GTDB are coloured in blue.

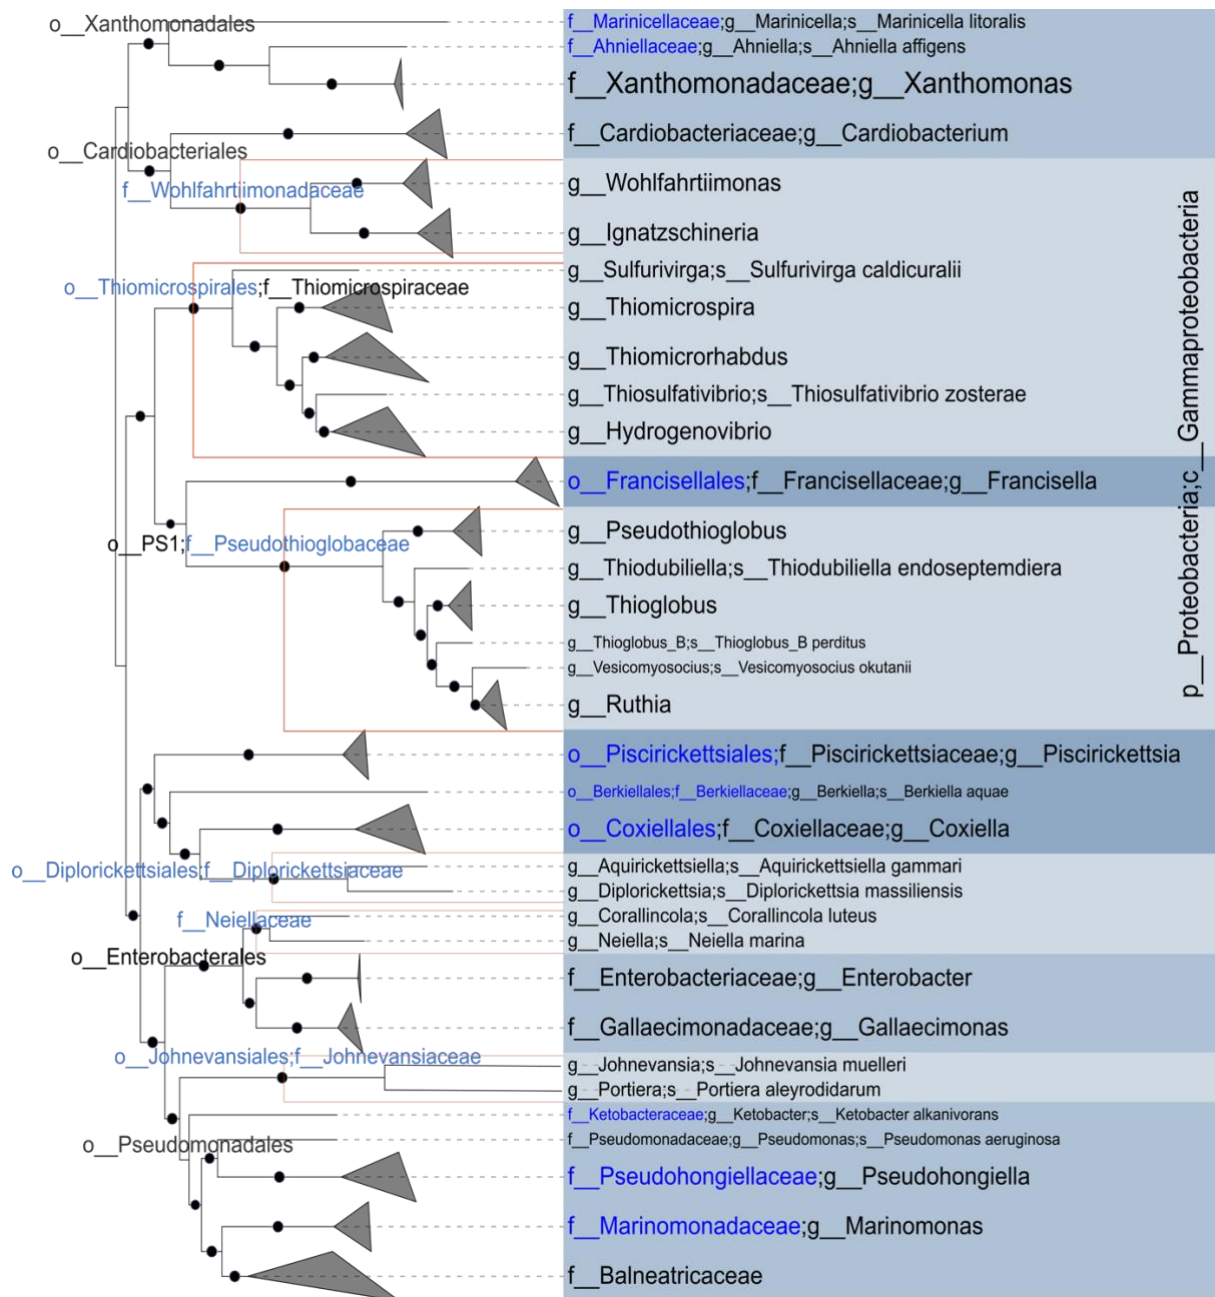

**Supplemental Figure 11.** Maximum likelihood phylogenetic inference of 120 concatenated protein markers using IQ-TREE under the LG matrix. Shading reflects rank-level grouping, with black circles indicating >90% support. Names of taxa defined in GTDB are coloured in blue.

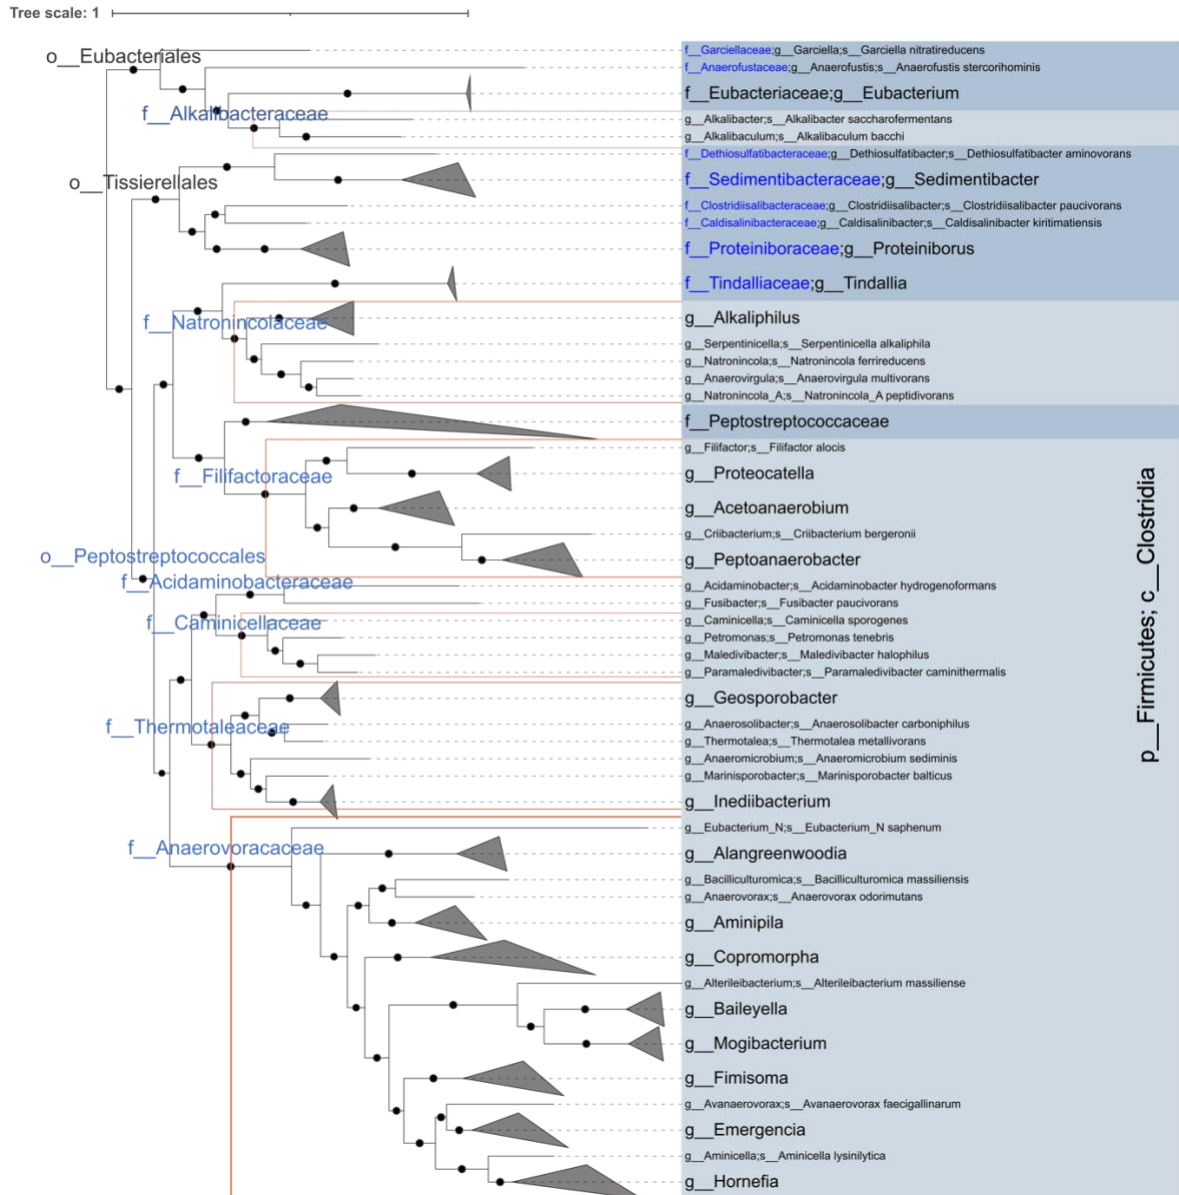

**Supplemental Figure 12.** Maximum likelihood phylogenetic inference of 120 concatenated protein markers using IQ-TREE under the LG matrix. Shading reflects rank-level grouping, with black circles indicating >90% support. Names of taxa defined in GTDB are coloured in blue.

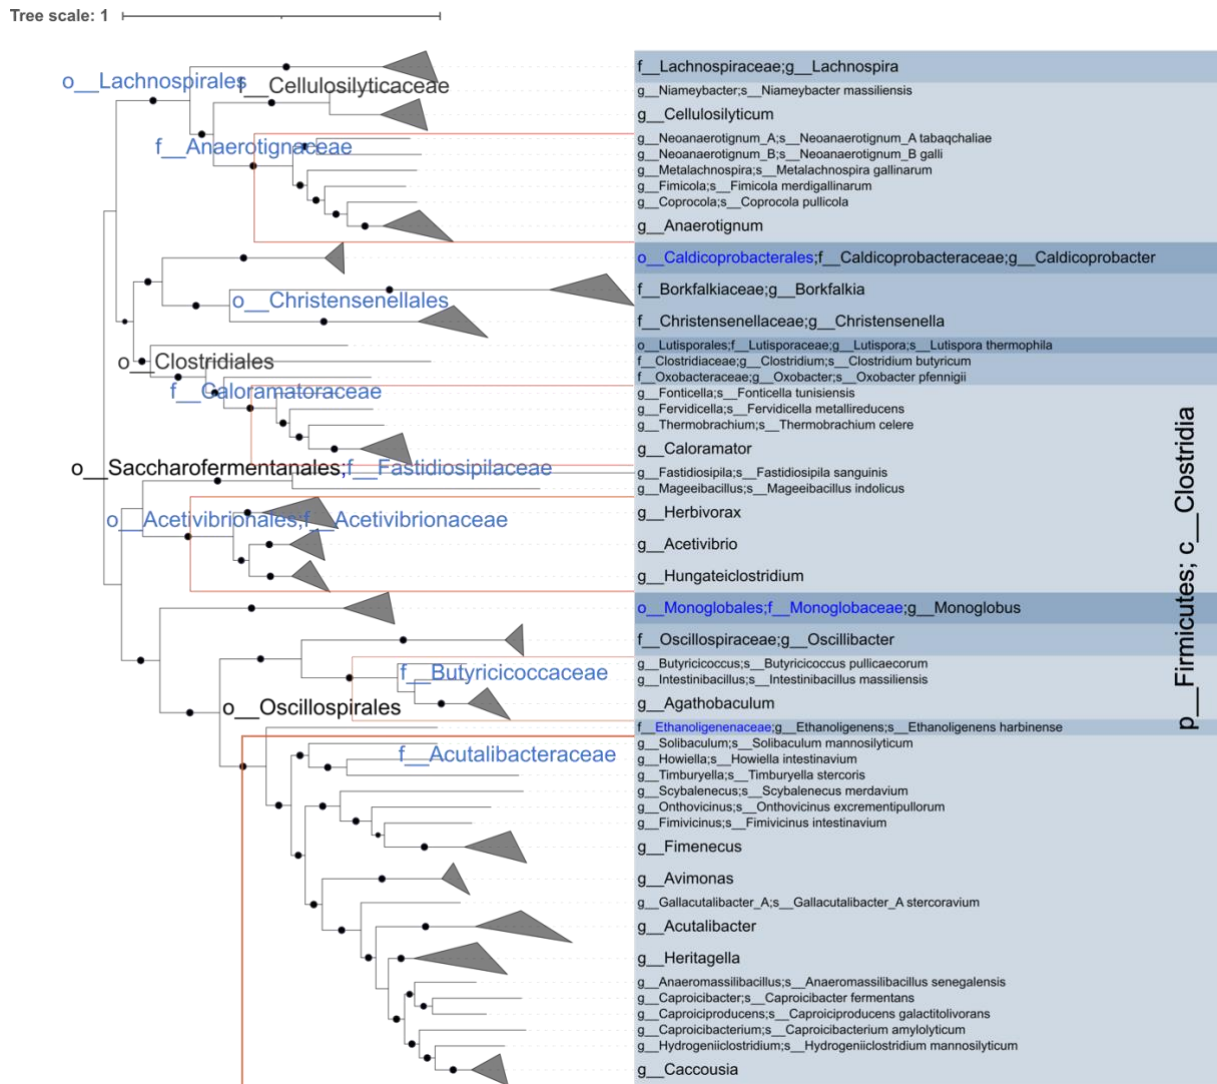

**Supplemental Figure 13.** Maximum likelihood phylogenetic inference of 120 concatenated protein markers using IQ-TREE under the LG matrix. Shading reflects rank-level grouping, with black circles indicating >90% support. Names of taxa defined in GTDB are coloured in blue.

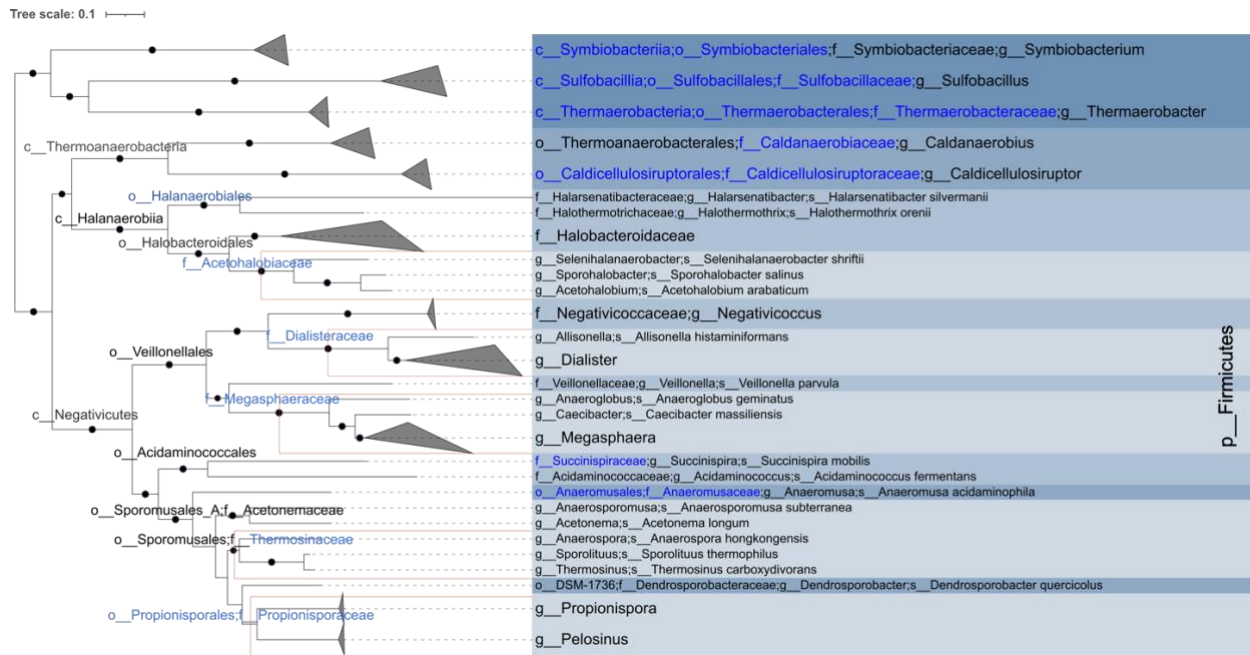

**Supplemental Figure 14.** Maximum likelihood phylogenetic inference of 120 concatenated protein markers using IQ-TREE under the LG matrix. Shading reflects rank-level grouping, with black circles indicating >90% support. Names of taxa defined in GTDB are coloured in blue.

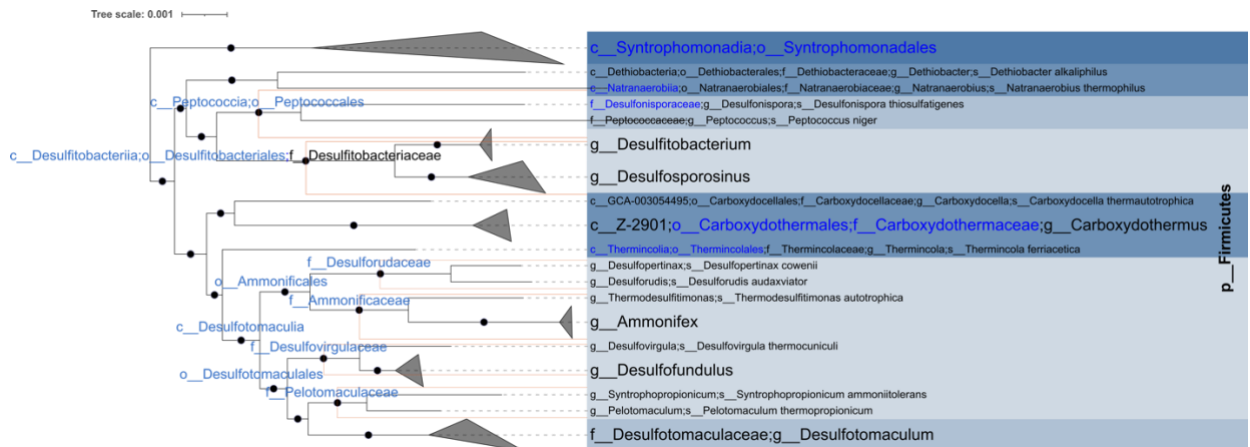

**Supplemental Figure 15.** Maximum likelihood phylogenetic inference of 120 concatenated protein markers using IQ-TREE under the LG matrix. Shading reflects rank-level grouping, with black circles indicating >90% support. Names of taxa defined in GTDB are coloured in blue.

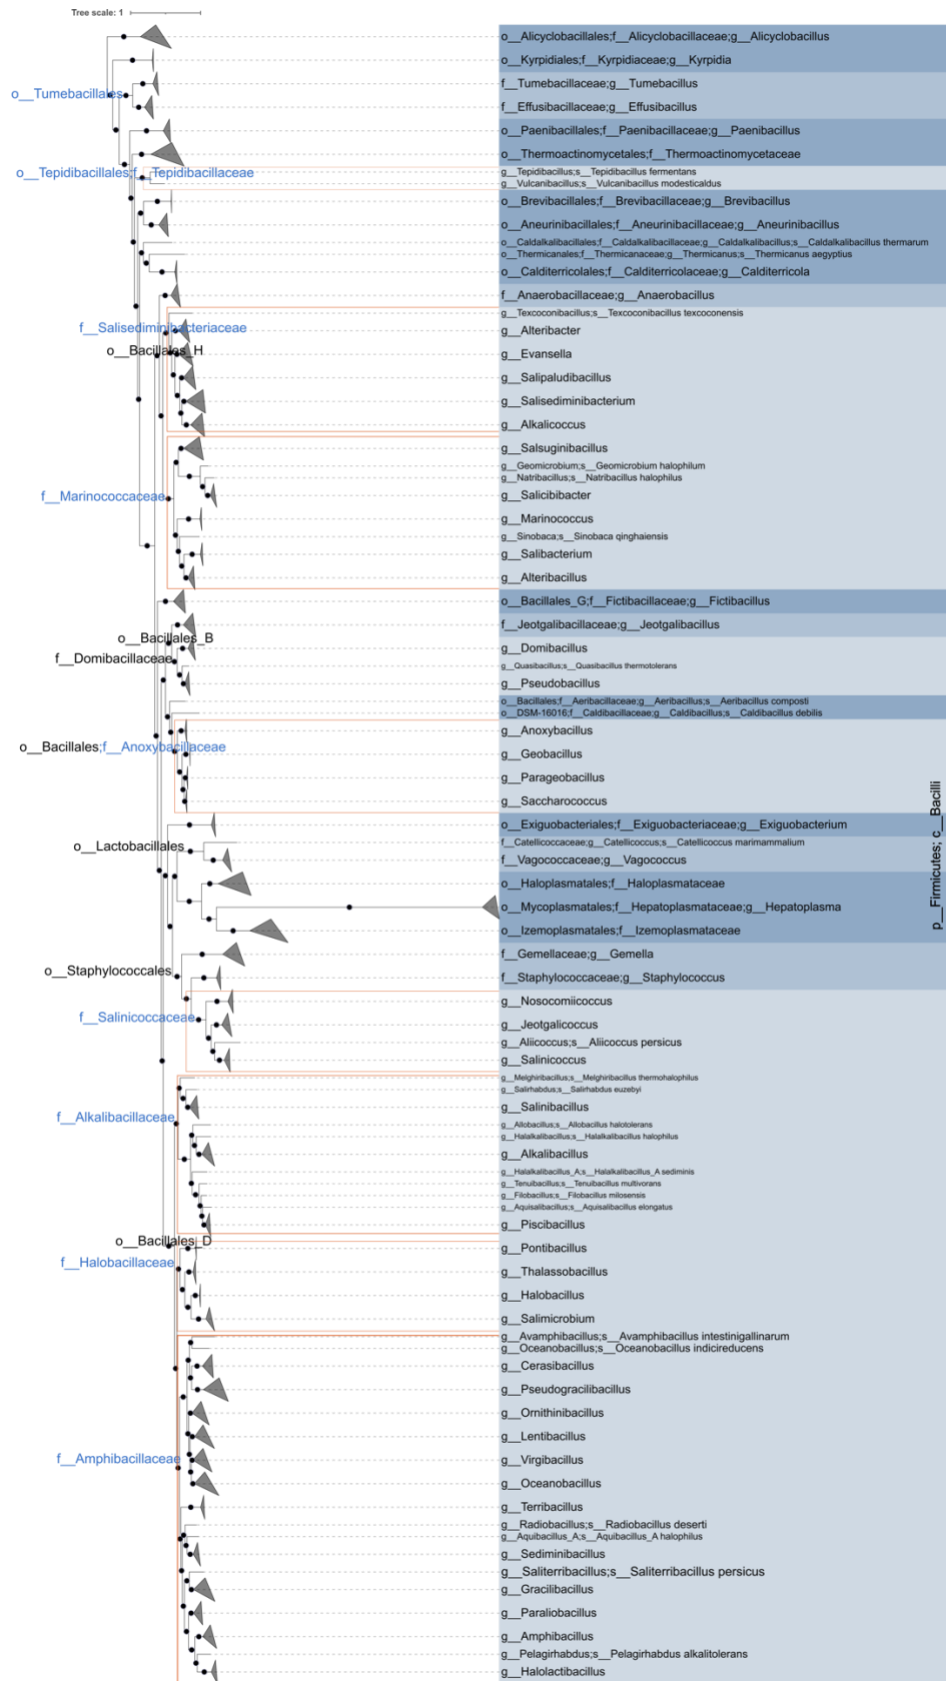

**Supplemental Figure 16.** Maximum likelihood phylogenetic inference of 120 concatenated protein markers using IQ-TREE under the LG matrix. Shading reflects rank-level grouping, with black circles indicating >90% support. Names of taxa defined in GTDB are coloured in blue.

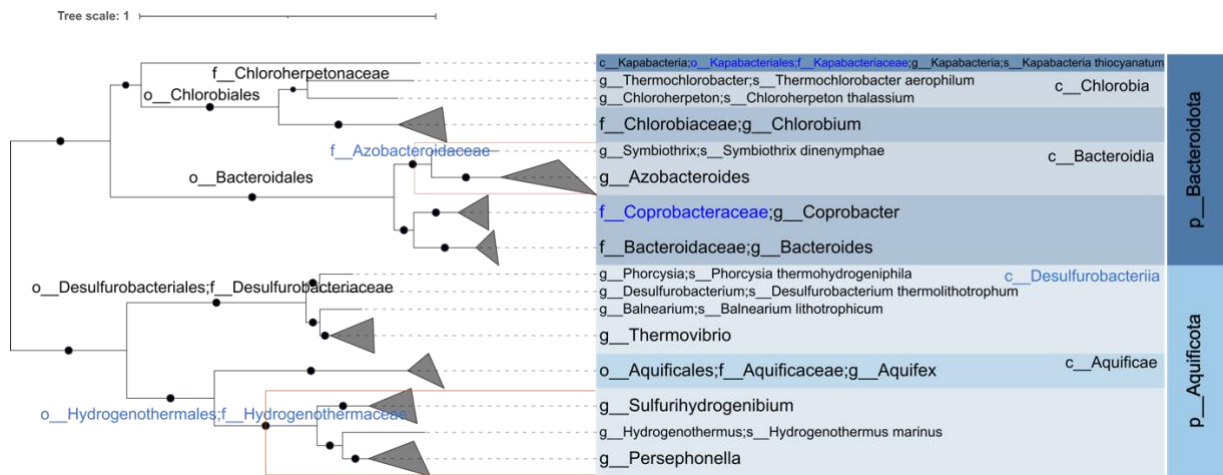

**Supplemental Figure 17.** Maximum likelihood phylogenetic inference of 120 concatenated protein markers using IQ-TREE under the LG matrix. Shading reflects rank-level grouping, with black circles indicating >90% support. Names of taxa defined in GTDB are coloured in blue.

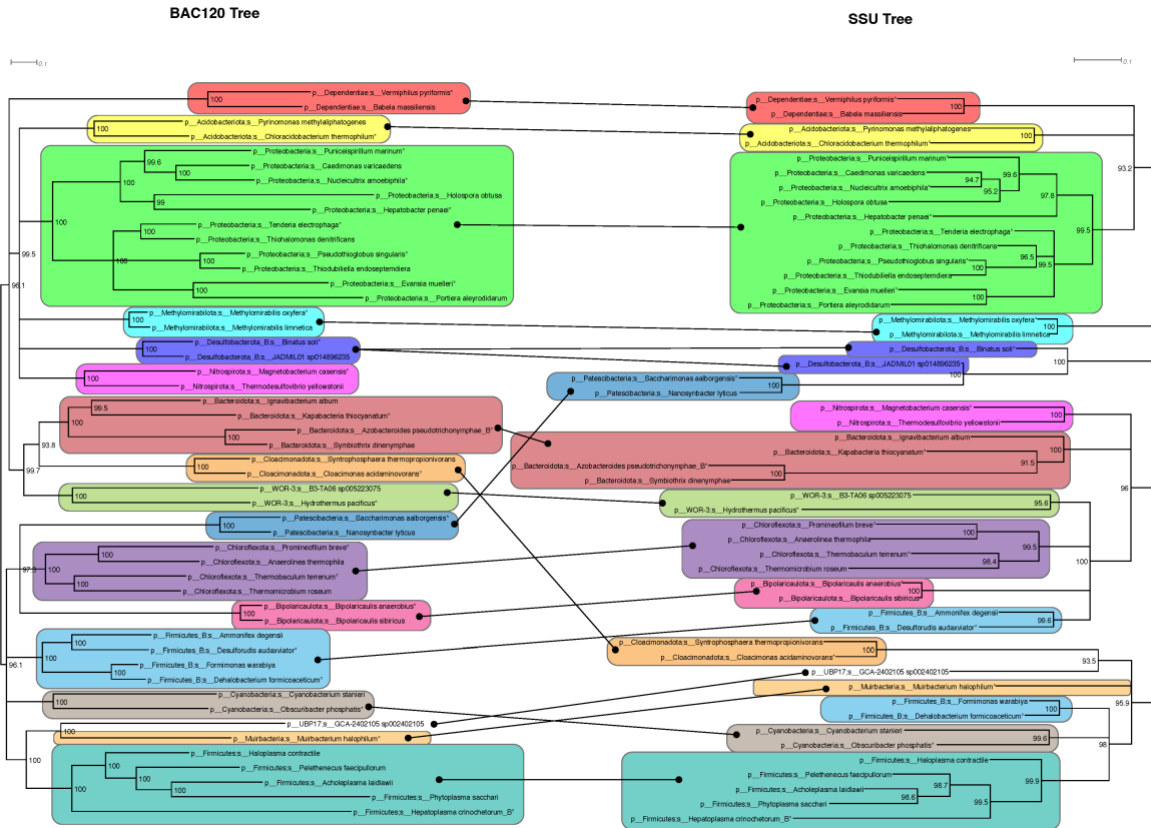

**Supplemental Figure 18.** Species-level phylogenies illustrating congruences between 16S rRNA gene and bac120 marker set taxonomies. Coloured boxes reflect phylum-level grouping and names applied to type species proposed under the SeqCode indicated with asterisk.
